# Supplementary material
Source: publisher figshare collection journal article supplement (https://sage.figshare.com/ndownloader/files/12918380)
Supplement: Supplementary file 1 [file 12918380]

This document contains 12 tables which make up the supplementary data analysis referred to in the three studies reported in Blatz & Mercier (2017) *False polarization and false moderation: Political opponents overestimate the extremity of each other’s ideologies but underestimate each other’s certainty.*

Table S1. *Post-hoc comparisons (with Bonferroni corrections) of self-reported and estimated certainty in Study 1.*

|  |  | **Self-Other** | | | |  | **Self-Own** | | | |  | **Own-Other** | | | |
| --- | --- | --- | --- | --- | --- | --- | --- | --- | --- | --- | --- | --- | --- | --- | --- |
| **Position / Stance** | ***n*** | ***Mdiff*** | **95% CI *Mdiff*** | ***SE Mdiff*** | ***p*** |  | ***Mdiff*** | **95% CI**  ***Mdiff*** | ***SE Mdiff*** | ***p*** |  | ***Mdiff*** | **95% CI *Mdiff*** | ***SE Mdiff*** | ***p*** |
| Pro-Life | 62 | 1.68 | (0.68, 2.68) | 0.41 | <.001 |  | 0.16 | (-0.29, 0.62) | 0.18 | 1 |  | 1.52 | (0.61, 2.42) | 0.37 | <.001 |
| Pro-Choice | 130 | 0.36 | (-0.15, 0.87) | 0.21 | .268 |  | 0.12 | (-0.30, 0.53) | 0.17 | 1 |  | 0.25 | (-0.20, 0.69) | 0.08 | .541 |
| Anti-Legalization | 67 | 1.15 | (0.23, 2.07) | 0.37 | .009 |  | 0.57 | (-0.18, 1.31) | 0.30 | .195 |  | 0.58 | (-0.27, 1.43) | 0.35 | .293 |
| Pro-Legalization | 100 | 0.96 | (0.23, 1.69) | 0.30 | .005 |  | -0.34 | (-0.78, 0.10) | 0.18 | .188 |  | 1.30 | (0.69, 1.91) | 0.25 | <.001 |
| Pro-Economy | 48 | -0.72 | (-1.63, 0.17) | 0.36 | .149 |  | -0.96 | (-1.58, -0.34) | 0.36 | .001 |  | 0.23 | (-0.43, 0.89) | 0.27 | 1 |
| Pro-Environment | 125 | 0.51 | (-0.06, 1.09) | 0.24 | .099 |  | -0.31 | (-0.77, 0.14) | 0.19 | .296 |  | 0.82 | (0.31, 1.34) | 0.21 | <.001 |
| Conservative Stance | 57 | 0.42 | (-0.32, 1.16) | 0.30 | .495 |  | 0.04 | (-0.54, 0.61) | 0.24 | 1 |  | 0.39 | (-0.25, 1.02) | 0.26 | .418 |
| Liberal  Stance | 84 | 0.02 | (-0.66, 0.71) | 0.28 | 1 |  | -0.26 | (-0.66, 0.13) | 0.16 | .310 |  | 0.29 | (-0.28, 0.85) | 0.23 | .650 |
| **Average** | **226** | **0.61** | **(0.27, 0.96)** | **0.14** | **<.001** |  | **-0.09** | **(-0.31, 0.13)** | **0.09** | **.982** |  | **0.70** | **(0.44, 0.97)** | **0.11** | **<.001** |

Table S2. *Self-reported certainty compared to estimates of certainty by the opposing side in Study 1.*

| **Position / Stance** | ***n*** | **Self** | **Estimate**  **By Other Side** | **95% CI *Mdiff*** | **df** | ***t*** | ***d*** | ***p*** |
| --- | --- | --- | --- | --- | --- | --- | --- | --- |
| Pro-Life | 62 | 7.68  (1.63) | 7.31 (2.03) | (-0.17, 0.91) | 148.33 | 1.35 | 0.23 | .179 |
| Pro-Choice | 130 | 7.67  (1.62) | 6.00  (2.51) | (0.98, 2.36) | 86.08 | 4.78 | 0.80 | <.001 |
| Anti-Legalization | 67 | 7.06  (1.76) | 6.36  (2.32) | (0.04, 1.36) | 162.54 | 2.21 | 0.34 | .028 |
| Pro-Legalization | 100 | 7.32  (1.55) | 5.91  (2.16) | (0.80, 2.02) | 110.67 | 4.61 | 0.75 | <.001 |
| Pro-Economy | 48 | 6.17  (1.60) | 6.30  (1.96) | (-0.76, 0.50) | 171 | -0.41 | -0.07 | .684 |
| Pro-Environment | 125 | 6.81  (1.66) | 6.89  (1.77) | (-0.65, 0.48) | 171 | -0.31 | -0.05 | .760 |
| Conservative Stance | 57 | 6.79  (1.53) | 7.01  (2.09) | (-0.83, 0.38) | 138.19 | -0.73 | -0.12 | .468 |
| Liberal  Stance | 84 | 7.04  (1.50) | 6.37  (1.79) | (0.12, 1.22) | 139 | 2.40 | 0.41 | .018 |

Table S3. *Post-hoc comparisons (with Bonferroni corrections) of self-reported and estimated certainty in Study 2.*

|  |  | **Self-Other** | | | |  | **Self-Own** | | | |  | **Own-Other** | | | |
| --- | --- | --- | --- | --- | --- | --- | --- | --- | --- | --- | --- | --- | --- | --- | --- |
| **Position / Stance** | ***n*** | ***Mdiff*** | **95% CI *Mdiff*** | ***SE Mdiff*** | ***p*** |  | ***Mdiff*** | **95% CI**  ***Mdiff*** | ***SE Mdiff*** | ***p*** |  | ***Mdiff*** | **95% CI *Mdiff*** | ***SE Mdiff*** | ***p*** |
| Pro-Life | 36 | 0.86 | (-0.30, 2.03) | 0.46 | .214 |  | -0.36 | (-1.06, 0.33) | 0.28 | .600 |  | 1.22 | (0.24, 2.21) | 0.39 | .011 |
| Pro-Choice | 60 | 0.70 | (-0.02, 1.42) | 0.29 | .061 |  | 0.27 | (-0.33, 0.87) | 0.24 | .833 |  | 0.43 | (-0.29, 1.16) | 0.30 | .443 |
| Anti-Legalization | 49 | 1.61 | (0.61, 2.61) | 0.40 | .001 |  | 0.94 | (0.05, 1.83) | 0.36 | .035 |  | 0.67 | (-0.34, 1.68) | 0.41 | .312 |
| Pro-Legalization | 39 | 0.59 | (-0.61, 1.79) | 0.48 | .672 |  | -0.23 | (-1.06, 0.60) | 0.33 | 1 |  | 0.82 | (-0.21, 1.85) | 0.41 | .161 |
| Conservative Stance | 25 | -0.20 | (-1.35, 0.95) | 0.45 | 1 |  | -0.52 | (-1.25, 0.21) | 0.28 | .237 |  | 0.32 | (-0.43, 1.07) | 0.29 | .856 |
| Liberal  Stance | 44 | 0.55 | (-0.50, 1.59) | 0.42 | .597 |  | 0.07 | (-0.69, 0.83) | 0.30 | 1 |  | 0.48 | (-0.31, 1.26) | 0.31 | .409 |
| **Average** | **115** | **0.79** | **(0.29, 1.30)** | **0.21** | **.001** |  | **0.08** | **(-0.28, 0.43)** | **0.15** | **1** |  | **0.71** | **(0.27, 1.16)** | **0.18** | **<.001** |

Table S4. *Self-reported certainty compared to estimates of certainty by the opposing side in Study 2.*

| **Position / Stance** | ***n*** | **Self** | **Estimate**  **By Other Side** | **95% CI *Mdiff*** | **df** | ***t*** | ***d*** | ***p*** |
| --- | --- | --- | --- | --- | --- | --- | --- | --- |
| Pro-Life | 36 | 7.28 (1.59) | 7.10 (2.11) | (-0.63, 0.99) | 94 | 0.44 | 0.10 | .664 |
| Pro-Choice | 60 | 7.80  (1.44) | 6.38 (2.53) | (0.51, 2.34) | 50.48 | 3.12 | 0.69 | .003 |
| Anti-Legalization | 49 | 7.63  (1.52) | 6.54 (2.36) | (0.22, 1.97) | 61.98 | 2.51 | 0.55 | .015 |
| Pro-Legalization | 39 | 7.13  (1.52) | 6.02 (2.63) | (0.22, 2.00) | 79.20 | 2.47 | 0.52 | .016 |
| Conservative Stance | 25 | 6.12  (1.81) | 6.11 (2.11) | (-1.00, 1.01) | 67 | .01 | 0.01 | .990 |
| Liberal  Stance | 45 | 6.64  (1.96) | 6.32 (1.84) | (-0.63, 1.28) | 68 | 0.68 | 0.17 | .500 |

Table S5. *Post-hoc comparisons (with Bonferroni corrections) of self-reported and estimated extremity of specific stance in Study 2.*

|  |  | **Self-Other** | | | |  | **Self-Own** | | | |  | **Own-Other** | | | |
| --- | --- | --- | --- | --- | --- | --- | --- | --- | --- | --- | --- | --- | --- | --- | --- |
| **Position / Stance** | ***N*** | ***Mdiff*** | **95% CI *Mdiff*** | ***SE Mdiff*** | ***p*** |  | ***Mdiff*** | **95% CI**  ***Mdiff*** | ***SE Mdiff*** | ***p*** |  | ***Mdiff*** | **95% CI *Mdiff*** | ***SE Mdiff*** | ***p*** |
| Pro-Life | 38 | 1.55 | (0.76, 2.35) | 0.32 | <.001 |  | 0.26 | (-0.14, 0.66) | 0.16 | .317 |  | 1.30 | (0.47, 2.11) | 0.33 | .001 |
| Pro-Choice | 64 | -0.52 | (-1.09, 0.61) | 0.24 | .095 |  | 0.05 | (-0.45, 0.54) | 0.20 | 1 |  | -0.56 | (-0.90, -0.22) | 0.14 | <.001 |
| Anti-Legalization | 53 | -0.72 | (-1.21, -0.22) | 0.20 | .002 |  | -0.28 | (-0.58, 0.02) | 0.12 | .072 |  | -0.43 | (-0.90, 0.04) | 0.19 | .078 |
| Pro-Legalization | 44 | 0.09 | (-0.30, 0.49) | 0.16 | 1 |  | -0.18 | (-0.47, 0.10) | 0.11 | .353 |  | 0.27 | (-0.14, 0.68) | 0.16 | .309 |
| Conservative Stance | 24 | -0.13 | (-1.35, 1.10) | 0.48 | 1 |  | -0.29 | (-1.26, 0.67) | 0.37 | 1 |  | 0.17 | (-0.90, 1.24) | 0.42 | 1 |
| Liberal Stance | 51 | -0.02 | (-1.15, 1.11) | 0.46 | 1 |  | -0.22 | (-0.91, 0.48) | 0.28 | 1 |  | 0.20 | (-0.83, 1.22) | 0.41 | 1 |

Table S6. *Self-reported specific stance compared to estimates of specific stance by the opposing side in Study 2.*

| **Position / Stance** | ***n*** | **Self** | **Estimate**  **By Other Side** | **95% CI *Mdiff*** | **df** | ***t*** | ***d*** | ***p*** |
| --- | --- | --- | --- | --- | --- | --- | --- | --- |
| Pro-Life | 38 | 5.50 (0.65) | 4.81 (1.36) | (-1.08, -0.29) | 96.46 | -3.45 | -0.65 | <.001 |
| Pro-Choice | 64 | 4.30  (1.00) | 3.95 (1.65) | (-0.25, 0.94) | 55.27 | 1.19 | -0.26 | .240 |
| Anti-Legalization | 53 | 3.36  (0.92) | 3.81 (0.87) | (-0.82, -.096) | 95 | 2.51 | 0.50 | .014 |
| Pro-Legalization | 44 | 3.91  (0.47) | 4.08 (0.90) | (-0.12, 0.45) | 81.71 | 1.17 | 0.24 | .245 |
| Conservative Stance | 24 | 5.17  (1.93) | 5.55 (2.07) | (-1.38, 0.62) | 73 | 0.76 | 0.19 | .449 |
| Liberal  Stance | 51 | 5.53  (1.96) | 5.29 (1.73) | (-1.10, 0.70) | 73 | 0.51 | -0.13 | .613 |

Table S7. *Post-hoc comparisons (with Bonferroni corrections) of self-reported and estimated certainty in Study 3.*

|  |  | **Self-Other** | | | | |  | **Self-Own** | | | |  | **Own-Other** | | | |
| --- | --- | --- | --- | --- | --- | --- | --- | --- | --- | --- | --- | --- | --- | --- | --- | --- |
| **Position / Stance** | ***N*** | ***Mdiff*** | | **95% CI *Mdiff*** | ***SE Mdiff*** | ***p*** |  | ***Mdiff*** | **95% CI**  ***Mdiff*** | ***SE Mdiff*** | ***p*** |  | ***Mdiff*** | **95% CI *Mdiff*** | ***SE Mdiff*** | ***p*** |
| Pro-Life | 26 | 0.73 | | (-0.73, 2.19) | 0.57 | .628 |  | 0.08 | (-0.77, 0.93) | 0.33 | 1 |  | 0.65 | (-0.50, 1.81) | 0.45 | .477 |
| Pro-Choice | 77 | 0.58 | | (-0.10, 1.27) | 0.28 | .122 |  | 0.08 | (-0.41, 0.57) | 0.20 | 1 |  | 0.51 | (-0.04, 1.05) | 0.22 | .075 |
| Anti-Legalization | 38 | 0.71 | | (-0.44, 1.86) | 0.46 | .390 |  | 0.08 | (-0.59, 0.74) | 0.27 | 1 |  | 0.63 | (-0.44, 1.71) | 0.43 | .448 |
| Pro-Legalization | 49 | 0.86 | | (-0.14, 1.85) | 0.40 | .111 |  | -0.43 | (-0.86, 0.00) | 0.17 | .050 |  | 1.29 | (0.49, 2.08) | 0.32 | .001 |
| Pro-Capital Punishment | 26 | -0.27 | | (-1.46, 0.92) | 0.46 | 1 |  | -0.08 | (-0.99, 0.83) | 0.36 | 1 |  | -0.19 | (-1.23, 0.84) | 0.40 | 1 |
| Anti-Capital Punishment | 49 | 2.08 | | (1.01, 3.15) | 0.43 | <.001 |  | 0.43 | (-0.41, 1.27) | 0.34 | .636 |  | 1.65 | (0.72, 2.58) | 0.38 | <.001 |
| Anti-Same Sex Marriage | 16 | 1.75 | | (-0.60, 4.10) | 0.87 | .190 |  | 0.00 | (-1.56, 1.56) | 0.58 | 1 |  | 1.75 | (-0.29, 3.79) | 0.76 | .105 |
| Pro-Same Sex Marriage | 86 | 2.51 | | (1.70, 3.32) | 0.33 | <.001 |  | 0.31 | (-0.01, 0.64) | 0.13 | .063 |  | 2.20 | (1.39, 3.00) | 0.33 | <.001 |
| **Average** | **123** | | **1.42** | **(0.94, 1.90)** | **0.20** | **<.001** |  | **0.16** | **(-0.09, 0.41)** | **0.10** | **.381** |  | **1.26** | **(0.84, 1.68)** | **0.17** | **<.001** |

Table S8. *Self-reported certainty compared to estimates of certainty by the opposing side in Study 3.*

| **Position / Stance** | ***n*** | **Self** | **Estimate**  **By Other Side** | **95% CI *Mdiff*** | **df** | ***t*** | ***d*** | ***p*** |
| --- | --- | --- | --- | --- | --- | --- | --- | --- |
| Pro-Life | 26 | 7.23 (2.12) | 7.06 (2.17) | (-0.81, 1.13) | 101 | 0.34 | 0.08 | .736 |
| Pro-Choice | 77 | 7.65  (1.75) | 6.50 (2.16) | (0.31, 1.99) | 101 | 2.72 | 0.59 | .008 |
| Anti-Legalization | 39 | 7.00  (1.73) | 6.41 (2.18) | (-0.24, 1.42) | 86 | 1.42 | 0.30 | .159 |
| Pro-Legalization | 49 | 7.27  (1.44) | 6.24 (2.36) | (0.16, 1.90) | 57.67 | 2.36 | 0.53 | .022 |
| Pro-Capital Punishment | 26 | 6.92  (1.44) | 5.33 (2.43) | (0.71, 2.49) | 71.98 | 3.57 | 0.80 | .001 |
| Anti-Capital Punishment | 49 | 7.41  (1.61) | 7.00 (1.36) | (-0.33, 1.15) | 73 | 1.10 | 0.28 | .274 |
| Anti-Same Sex Marriage | 16 | 7.75  (2.11) | 6.02 (2.88) | (0.47, 2.98) | 26.58 | 2.82 | 0.69 | .009 |
| Pro-Same Sex Marriage | 87 | 8.54  (1.04) | 6.00 (2.76) | (1.06, 4.02) | 15.80 | 3.64 | 1.22 | .002 |

Table S9. *Post-hoc comparisons (with Bonferroni corrections) of self-reported extremity of specific stance and estimated extremity of specific stance in Study 3.*

|  |  | **Self-Other** | | | |  | **Self-Own** | | | |  | **Own-Other** | | | |
| --- | --- | --- | --- | --- | --- | --- | --- | --- | --- | --- | --- | --- | --- | --- | --- |
| **Position / Stance** | ***n*** | ***Mdiff*** | **95% CI *Mdiff*** | ***SE Mdiff*** | ***p*** |  | ***Mdiff*** | **95% CI**  ***Mdiff*** | ***SE Mdiff*** | ***p*** |  | ***Mdiff*** | **95% CI *Mdiff*** | ***SE Mdiff*** | ***p*** |
| Pro-Life | 30 | 1.27 | (0.31, 2.23) | 0.38 | .007 |  | 0.50 | (-0.20, 1.20) | 0.27 | .236 |  | 0.77 | (-0.17, 1.70) | 0.37 | .137 |
| Pro-Choice | 63 | -0.30 | (-1.02, 0.42) | 0.29 | .913 |  | 0.29 | (-0.38, 0.95) | 0.27 | .888 |  | -0.59 | (-0.98, -0.19) | 0.16 | .002 |
| Anti-Legalization | 34 | -0.32 | (-1.00, 0.36) | 0.27 | .715 |  | -0.09 | (-0.64, 0.46) | 0.22 | 1 |  | -0.24 | (-0.88, 0.40) | 0.25 | 1 |
| Pro-Legalization | 50 | 0.44 | (0.05, 0.84) | 0.16 | .024 |  | -0.26 | (-0.48, -0.04) | 0.09 | .016 |  | 0.70 | (0.32, 1.08) | 0.15 | <.001 |
| Pro-Capital Punishment | 47 | -0.36 | (-1.05, 0.32) | 0.28 | .590 |  | 0.36 | (-0.30, 1.02) | 0.27 | .541 |  | -0.72 | (-1.20, -0.25) | 0.19 | .001 |
| Anti-Capital Punishment | 51 | 2.06 | (1.17, 2.95) | 0.36 | <.001 |  | 0.51 | (-0.10, 1.12) | 0.25 | .131 |  | 1.55 | (0.70, 2.40) | 0.34 | <.001 |
| Anti-Same Sex Marriage | 15 | 1.73 | (0.15, 3.31) | 0.58 | .030 |  | 2.93 | (1.01, 4.85) | 0.71 | .003 |  | -1.20 | (-3.14, 0.74) | 0.71 | .342 |
| Pro-Same Sex Marriage | 87 | 0.94 | (0.29, 1.60) | 0.27 | .002 |  | 0.25 | (-0.19, 0.70) | 0.18 | .506 |  | 0.69 | (0.19, 1.19) | 0.21 | .004 |

Table S10. *Self-reported specific stance compared to estimates of specific stance by the opposing side in Study 3.*

| **Position / Stance** | ***N*** | **Self** | **Estimate**  **By Other**  **Side** | **95% CI *Mdiff*** | **df** | ***t*** | ***d*** | ***p*** |
| --- | --- | --- | --- | --- | --- | --- | --- | --- |
| Pro-Life | 30 | 5.37 (0.62) | 4.65  (1.60) | (0.26, 1.17) | 88.30 | 3.11 | 0.59 | .003 |
| Pro-Choice | 63 | 4.35  (1.18) | 4.10  (1.69) | (-0.94, 0.44) | 42.97 | -0.73 | 0.17 | .471 |
| Anti-Legalization | 34 | 3.38  (0.82) | 3.60  (0.90) | (-0.60, 0.17) | 82 | -1.13 | 0.26 | .264 |
| Pro-Legalization | 50 | 4.04  (0.49) | 3.71  (1.03) | (-0.72, 0.05) | 43.37 | -1.76 | 0.41 | .086 |
| Pro-Capital Punishment | 47 | 7.02  (1.07) | 5.75  (2.21) | (0.59, 1.97) | 73.67 | 3.68 | 0.73 | <.001 |
| Anti-Capital Punishment | 51 | 7.80  (1.18) | 7.38  (1.87) | (-1.06, 0.22) | 76.59 | -1.32 | 0.27 | .191 |
| Anti-Same Sex Marriage | 15 | 8.67  (0.62) | 7.02  (2.20) | (1.08, 2.21) | 79.79 | 5.79 | 1.02 | <.001 |
| Pro-Same Sex Marriage | 87 | 7.97  (1.88) | 6.93  (2.19) | (-2.10, 0.04) | 100 | -1.92 | 0.51 | .058 |

Table S11. *Post-hoc comparisons (with Bonferroni corrections) of self-reported extremity of ideology and estimated extremity of ideology in Study 3.*

|  |  | **Self-Other** | | | |  | **Self-Own** | | | |  | **Own-Other** | | | |
| --- | --- | --- | --- | --- | --- | --- | --- | --- | --- | --- | --- | --- | --- | --- | --- |
| **Position / Stance** | ***n*** | ***Mdiff*** | **95% CI *Mdiff*** | ***SE Mdiff*** | ***p*** |  | ***Mdiff*** | **95% CI**  ***Mdiff*** | ***SE Mdiff*** | ***p*** |  | ***Mdiff*** | **95% CI *Mdiff*** | ***SE Mdiff*** | ***p*** |
| Pro-Life | 23 | -0.65 | (-1.86, 0.55) | 0.47 | .523 |  | -0.70 | (-2.07, 0.68) | 0.53 | .612 |  | 0.04 | (-0.78, 0.87) | 0.32 | 1 |
| Pro-Choice | 67 | -0.33 | (-0.93, 0.28) | 0.25 | .558 |  | -0.13 | (-0.86, 0.59) | 0.29 | 1 |  | -0.19 | (-0.69, -0.30) | 0.20 | 1 |
| Anti-Legalization | 24 | -1.13 | (-2.67, 0.42) | 0.60 | .220 |  | -0.88 | (-2.42, 0.67) | 0.60 | .475 |  | -0.25 | (-0.97, 0.47) | 0.28 | 1 |
| Pro-Legalization | 47 | -0.32 | (-0.96, 0.32) | 0.26 | .669 |  | -0.23 | (-0.98, 0.52) | 0.30 | 1 |  | -0.09 | (-0.87, 0.70) | 0.31 | 1 |
| Pro-Capital Punishment | 33 | -1.88 | (-3.14, -0.62) | 0.50 | .002 |  | -1.49 | (-2.71, -0.26) | 0.49 | .013 |  | -0.39 | (-1.18, 0.39) | 0.31 | 1 |
| Anti-Capital Punishment | 43 | 0.05 | (-0.71, 0.81) | 0.31 | 1 |  | 0.42 | (-0.35, 1.19) | 0.31 | .541 |  | -0.37 | (-1.13, 0.38) | 0.30 | .680 |
| Anti-Same Sex Marriage | 19 | -0.79 | (-2.32, 0.74) | 0.58 | .571 |  | -0.58 | (-2.36, 1.21) | 0.68 | 1 |  | -0.21 | (-2.28, 1.86) | 0.79 | 1 |
| Pro-Same Sex Marriage | 74 | -0.98 | (-1.66, -0.28) | 0.28 | .003 |  | -0.60 | (-1.21, 0.03) | 0.25 | .066 |  | -0.38 | (-1.03, 0.28) | 0.27 | .483 |

Table S12. *Self-reported ideological extremity compared to estimates of ideological extremity by the opposing side in Study 3.*

| **Position / Stance** | ***N*** | **Self** | **Estimate**  **By Other**  **Group** | **95% CI *Mdiff*** | **df** | ***t*** | ***d*** | ***p*** |
| --- | --- | --- | --- | --- | --- | --- | --- | --- |
| Pro-Life | 23 | 6.22 (2.15) | 6.81  (2.02) | (-1.58, 0.40) | 88 | -1.18 | 0.28 | .240 |
| Pro-Choice | 67 | 6.48  (1.59) | 6.86  (1.58) | (-0.37, 1.15) | 88 | 1.02 | 0.25 | .309 |
| Anti-Legalization | 24 | 5.04  (2.14) | 7.21  (1.72) | (-3.11, -1.24) | 69 | 4.63 | 1.12 | <.001 |
| Pro-Legalization | 47 | 6.89  (1.31) | 6.17  (2.37) | (-1.79, 0.33) | 30.31 | -1.40 | 0.38 | .172 |
| Pro-Capital Punishment | 33 | 4.61  (2.03) | 6.30  (2.20) | (-2.67, -0.72) | 74 | -3.45 | 0.80 | .001 |
| Anti-Capital Punishment | 43 | 6.35  (1.96) | 6.48  (1.86) | (-0.75, 1.02) | 74 | 0.31 | 0.07 | .955 |
| Anti-Same Sex Marriage | 19 | 5.37  (2.06) | 7.36  (1.90) | (-2.98, -1.00) | 91 | -4.02 | 1.00 | <.001 |
| Pro-Same Sex Marriage | 74 | 6.39  (1.80) | 6.16  (2.43) | (-1.22, 0.76) | 91 | -0.47 | 0.11 | .640 |
